# Supplementary material
Source: MDPI journal article supplement (https://www.mdpi.com/1999-4907/10/9/812)
Supplement: s1 [file s1]

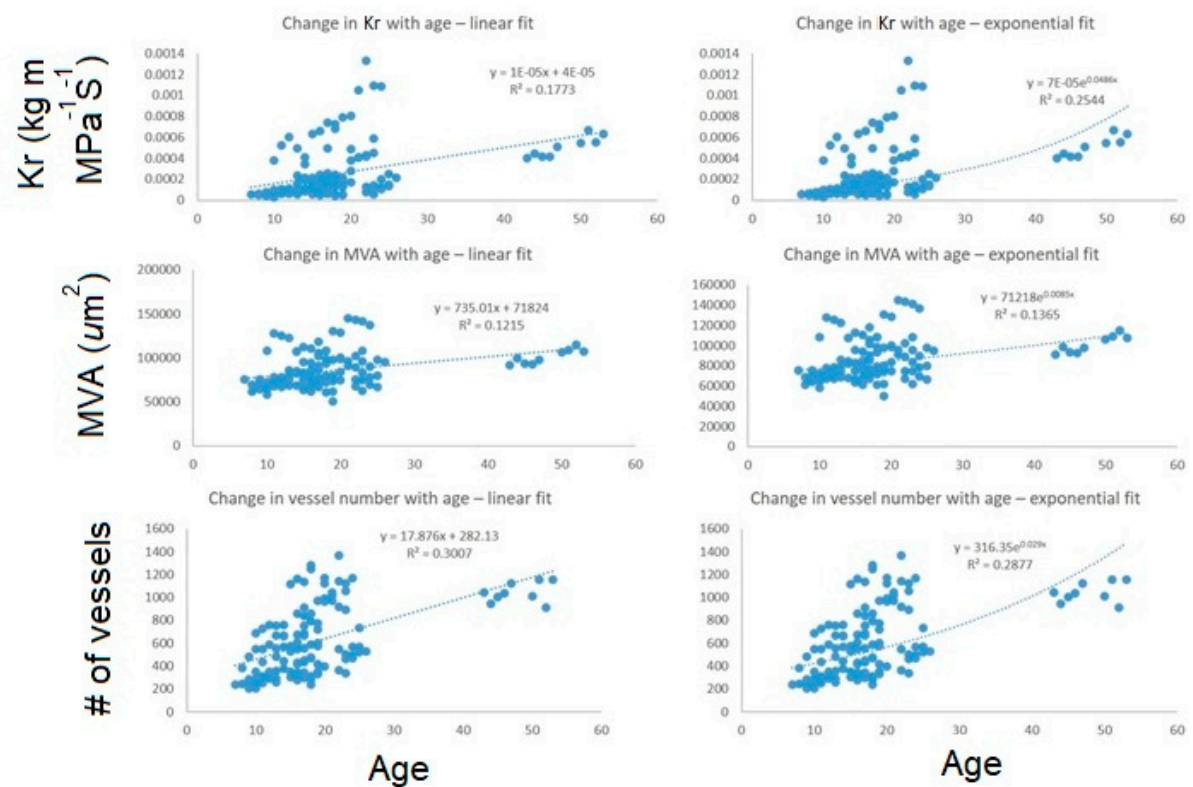

**Supp. Fig. 1.** Three paneled-figure showing change in  $K_r$ , MVA, and vessel number as a function of age in both a linear (left) and exponential (right) fit. Fitting an exponential curve on this relationship explained more variance for  $K_r$  and MVA, while a linear fit explained slightly more variance for vessel number. The above curves were used to determine which type of age detrending was to be applied to the raw values of  $K_h$ , MVA, and number of vessels for the 11 year time-series for each disc.

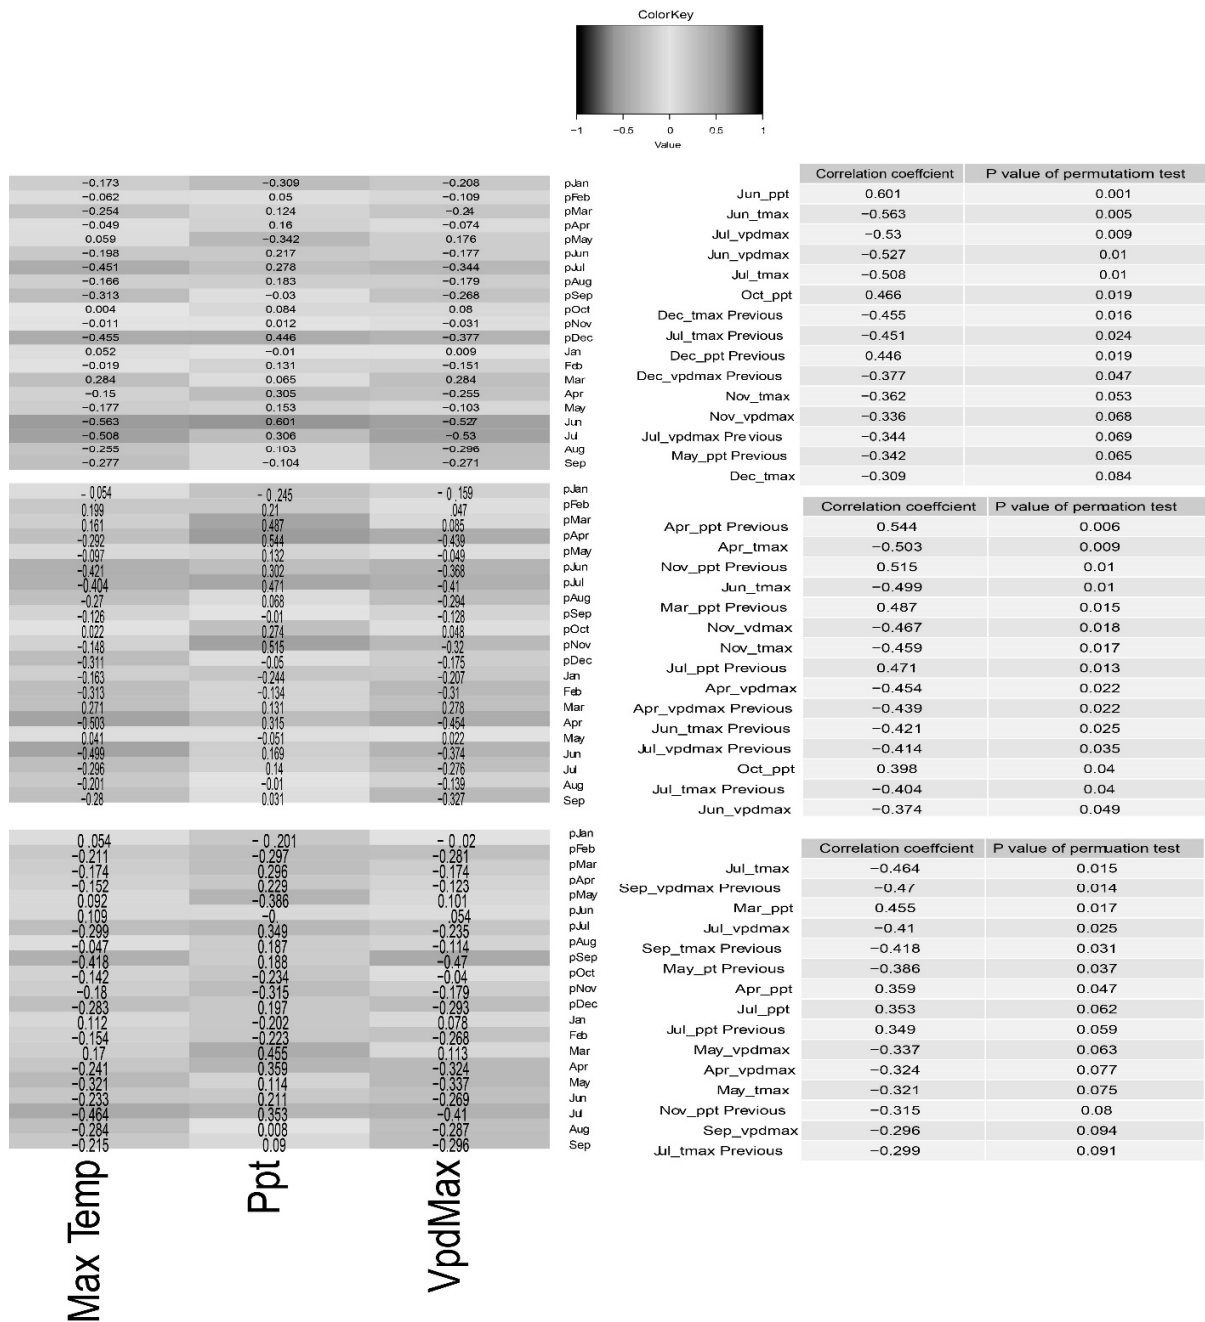

**Supp. Fig. 2.** Three paneled-figure showing heatmaps and associated tables for monthly climate correlation coefficients and their associated *p* values (derived from bootstrapping, only the top 15 correlations) for potential hydraulic conductivity  $K_r$  (top), mean vessel area MVA, and vessel number (bottom). Max Temp (tmax), precipitation sum for each month in cm (ppt), and maximum daily vapor pressure average for each month (VpdMax) for each month within the 24 month period were correlated with the age-detrended “transect” values for  $K_r$ , MVA, and vessel number. Heatmaps only show through the current Sep, since we did not consider the correlations after this monthly period, though these correlation coefficients may still be found in the accompanying table if the relationship is one of the top 15 correlations.
